# Supplementary material
Source: MDPI journal article supplement (https://www.mdpi.com/2304-6740/10/4/45)
Supplement: s1 [file s1]

---

## Supporting Information

# Ionic Conductivity of LiSiON and the Effect of Amorphization / Heterovalent Doping on Li<sup>+</sup> Diffusion

*Siyuan Wu*<sup>1,2</sup>, *Ruijuan Xiao*<sup>1,2,\*</sup>, *Hong Li*<sup>1,2,\*</sup> and *Liquan Chen*<sup>1,2</sup>

1 Beijing Advanced Innovation Center for Materials Genome Engineering, Institute of Physics, Chinese Academy of Sciences, Beijing 100190, China

2 School of Physical Sciences, University of Chinese Academy of Sciences, Beijing, China

\* Correspondence: [rjxiao@iphy.ac.cn](mailto:rjxiao@iphy.ac.cn) (R.X.); [hli@iphy.ac.cn](mailto:hli@iphy.ac.cn) (H.L.)

### Table of Contents

Figure S1. The mean-squared-displacements (MSD) for Li<sup>+</sup>, Si<sup>4+</sup>, O<sup>2-</sup> and N<sup>3-</sup> ions simulated by AIMD (a) for  $\alpha$ -LiSiON at 2600 K and (b) for amorphous-LiSiON at 1100 K.

Figure S2. The partial radial distribution function (PRDF) for Li-O, Li-N, Si-O and Si-N pairs in amorphous-LiSiON.

Table S1. The total energies of 16 configurations for P-doped LiSiON system and the Li<sup>+</sup> ion diffusion barrier evaluated by BV method.

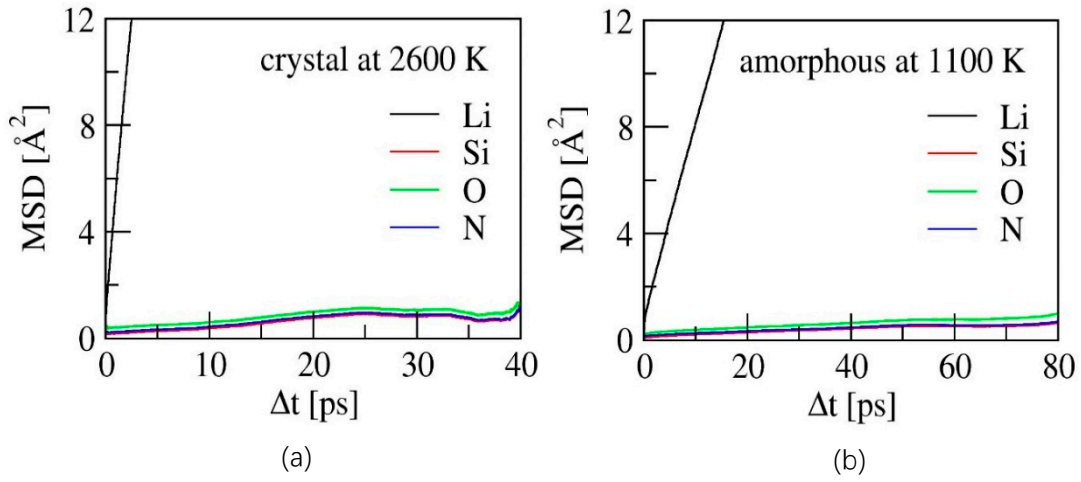

Figure S1. The mean-squared-displacements (MSD) for Li<sup>+</sup>, Si<sup>4+</sup>, O<sup>2-</sup> and N<sup>3-</sup> ions simulated by AIMD (a) for α-LiSiON at 2600 K and (b) for amorphous-LiSiON at 1100 K.

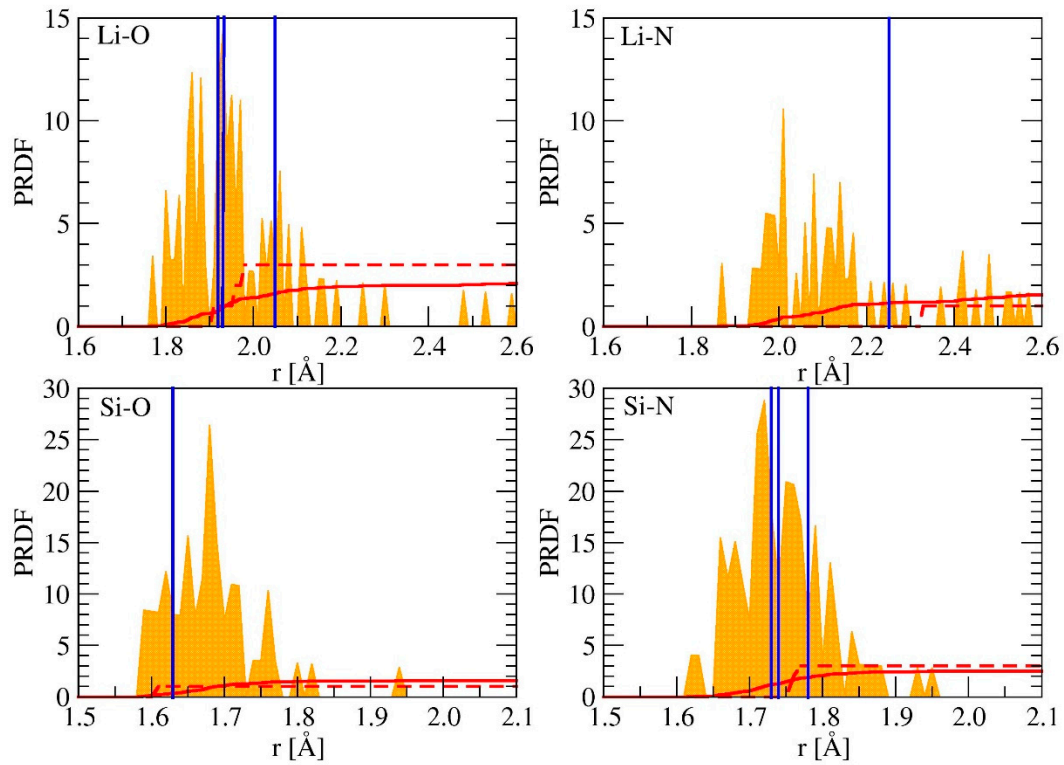

Figure S2. The partial radial distribution function (PRDF) for Li-O, Li-N, Si-O and Si-N pairs in amorphous-LiSiON. The pair correlation functions are shown in orange color and the integrated values for the PRDF are shown in red solid curves. For comparison, the integrated PRDFs for crystal α-LiSiON are given in red dashed curves, and the bond lengths appear in the crystal phase are labelled by perpendicular blue lines.

Table S1. The total energies ( $E_{\text{tot}}$ ) of 16 configurations for  $\text{Li}_{0.75}\text{Si}_{0.75}\text{P}_{0.25}\text{ON}$  and the  $\text{Li}^+$  ion diffusion barriers evaluated by BV method ( $E_a$  by BV).

| Configuration No. | $E_{\text{tot}}$ [eV/f.u.] | $E_a$ by BV [eV] | Configuration No. | $E_{\text{tot}}$ [eV/f.u.] | $E_a$ by BV [eV] |
|-------------------|----------------------------|------------------|-------------------|----------------------------|------------------|
| 1                 | -26.679                    | 0.72             | 9                 | -26.678                    | 0.73             |
| 2                 | -26.670                    | 0.80             | 10                | -26.686                    | 0.92             |
| 3                 | -26.678                    | 0.73             | 11                | -26.687                    | 0.73             |
| 4                 | -26.686                    | 0.92             | 12                | -26.670                    | 0.81             |
| 5                 | -26.670                    | 0.80             | 13                | -26.661                    | 0.93             |
| 6                 | -26.680                    | 0.73             | 14                | -26.671                    | 0.72             |
| 7                 | -26.676                    | 0.91             | 15                | -26.654                    | 0.81             |
| 8                 | -26.678                    | 0.73             | 16                | -26.687                    | 0.73             |

Table S2. The total energies ( $E_{\text{tot}}$ ) of 12 configurations for  $\text{Li}_{0.5}\text{Si}_{0.5}\text{P}_{0.5}\text{ON}$  and the  $\text{Li}^+$  ion diffusion barriers evaluated by BV method ( $E_a$  by BV).

| Configuration No. | $E_{\text{tot}}$ [eV/f.u.] | $E_a$ by BV [eV] | Configuration No. | $E_{\text{tot}}$ [eV/f.u.] | $E_a$ by BV [eV] |
|-------------------|----------------------------|------------------|-------------------|----------------------------|------------------|
| 1                 | -25.164                    | 0.88             | 7                 | -25.166                    | 0.94             |
| 2                 | -25.163                    | 0.97             | 8                 | -25.162                    | 0.94             |
| 3                 | -25.142                    | 1.05             | 9                 | -25.029                    | 1.07             |
| 4                 | -25.121                    | 0.93             | 10                | -25.081                    | 0.94             |
| 5                 | -25.166                    | 1.21             | 11                | -25.164                    | 0.95             |
| 6                 | -25.150                    | 1.02             | 12                | -25.050                    | 0.91             |

Table S3. The total energies ( $E_{\text{tot}}$ ) of 4 configurations for  $\text{Li}_{0.25}\text{Si}_{0.25}\text{P}_{0.75}\text{ON}$  and the  $\text{Li}^+$  ion diffusion barriers evaluated by BV method ( $E_a$  by BV).

| Configuration No. | $E_{\text{tot}}$ [eV/f.u.] | $E_a$ by BV [eV] | Configuration No. | $E_{\text{tot}}$ [eV/f.u.] | $E_a$ by BV [eV] |
|-------------------|----------------------------|------------------|-------------------|----------------------------|------------------|
| 1                 | -23.373                    | 1.20             | 3                 | -23.374                    | 1.10             |
| 2                 | -23.367                    | 1.34             | 4                 | -23.385                    | 1.05             |

Table S4. The estimated value for the ionic conductivities at 300 K for crystal  $\alpha$ -LiSiON, amorphous-LiSiON and P-doped LiSiON ( $\text{Li}_{0.75}\text{Si}_{0.75}\text{P}_{0.25}\text{ON}$ ) according to the Arrhenius plot of diffusion coefficients represented in Figures 4b, 6b and 8, respectively.

| Configurations           | $E_a$ [eV] | $E_a$ error [eV] | Conductivity at 300K [mS/cm] |
|--------------------------|------------|------------------|------------------------------|
| crystal $\alpha$ -LiSiON | 1.59       | 0.24             | $2.5 \times 10^{-20}$        |
| amorphous-LiSiON         | 0.18       | 0.08             | 8.1                          |
| P-doped LiSiON           | 0.44       | 0.16             | $3.9 \times 10^{-3}$         |
